# Supplementary material for: Synthesis, biological and molecular modelling for 1,3,4-thiadiazole sulfonyl thioureas: bacterial and fungal activity
Source: Royal Society of Chemistry journal article supplement (doi:10.1039/d3md00508a), 2023-01-01

## Synthesis, biological and molecular modeling for 1,3,4-thiadiazole sulfonylthioureas: Bacterial and fungal activity

Nguyen Dinh Thanh,<sup>a\*</sup> Vu Ngoc Toan,<sup>a,b</sup> Nguyen Thi Kim Giang,<sup>a,c</sup> Hoang Thi Kim Van,<sup>a,d</sup> Do Son Hai,<sup>a,c</sup> Nguyen Minh Tri,<sup>a,c</sup> Duong Ngoc Toan<sup>a,e</sup>

<sup>a</sup> Faculty of Chemistry, University of Science (Vietnam National University, Hanoi), 19 Le Thanh Tong, Ha Noi, Viet Nam.

<sup>b</sup> Institute of New Technology, Military Institute of Science and Technology (Ministry of Military), 17 Hoang Sam, Cau Giay, Ha Noi, Viet Nam.

<sup>c</sup> Institute of Science and Technology, Ministry of Public Security of Vietnam, 47 Pham Van Dong, Cau Giay, Ha Noi, Vietnam.

<sup>d</sup> Faculty of Chemical Technology, Viet Tri University of Industry, Tien Kien, Lam Thao, Phu Tho, Viet Nam.

<sup>e</sup> Faculty of Chemistry, Thai Nguyen University of Education, 20 Luong Ngoc Quyen, Thai Nguyen, Viet Nam.

### Table of Contents

|                                                                               |     |
|-------------------------------------------------------------------------------|-----|
| 1-(1,3,4-Thiadiazole-2-yl)-3-(4-tolylsulfonyl)thiourea (6a).....              | S2  |
| 1-(5-Methyl-1,3,4-thiadiazole-2-yl)-3-(4-tolylsulfonyl)thiourea (6b).....     | S3  |
| 1-(5-Ethyl-1,3,4-thiadiazole-2-yl)-3-(4-tolylsulfonyl)thiourea (6c).....      | S5  |
| 1-(5-Propyl-1,3,4-thiadiazole-2-yl)-3-(4-tolylsulfonyl)thiourea (6d).....     | S6  |
| 1-(5-Isopropyl-1,3,4-thiadiazole-2-yl)-3-(4-tolylsulfonyl)thiourea (6e) ..... | S8  |
| 1-(5-Butyl-1,3,4-thiadiazole-2-yl)-3-(4-tolylsulfonyl)thiourea (6f) .....     | S9  |
| 1-(5-Isobutyl-1,3,4-thiadiazole-2-yl)-3-(4-tolylsulfonyl)thiourea (6g) .....  | S11 |
| 1-(5-Pentyl-1,3,4-thiadiazole-2-yl)-3-(4-tolylsulfonyl)thiourea (6h) .....    | S12 |
| 1-(5-Isopentyl-1,3,4-thiadiazole-2-yl)-3-(4-tolylsulfonyl)thiourea (6i) ..... | S14 |

1-(1,3,4-Thiadiazole-2-yl)-3-(4-tolylsulfonyl)thiourea (**6a**)

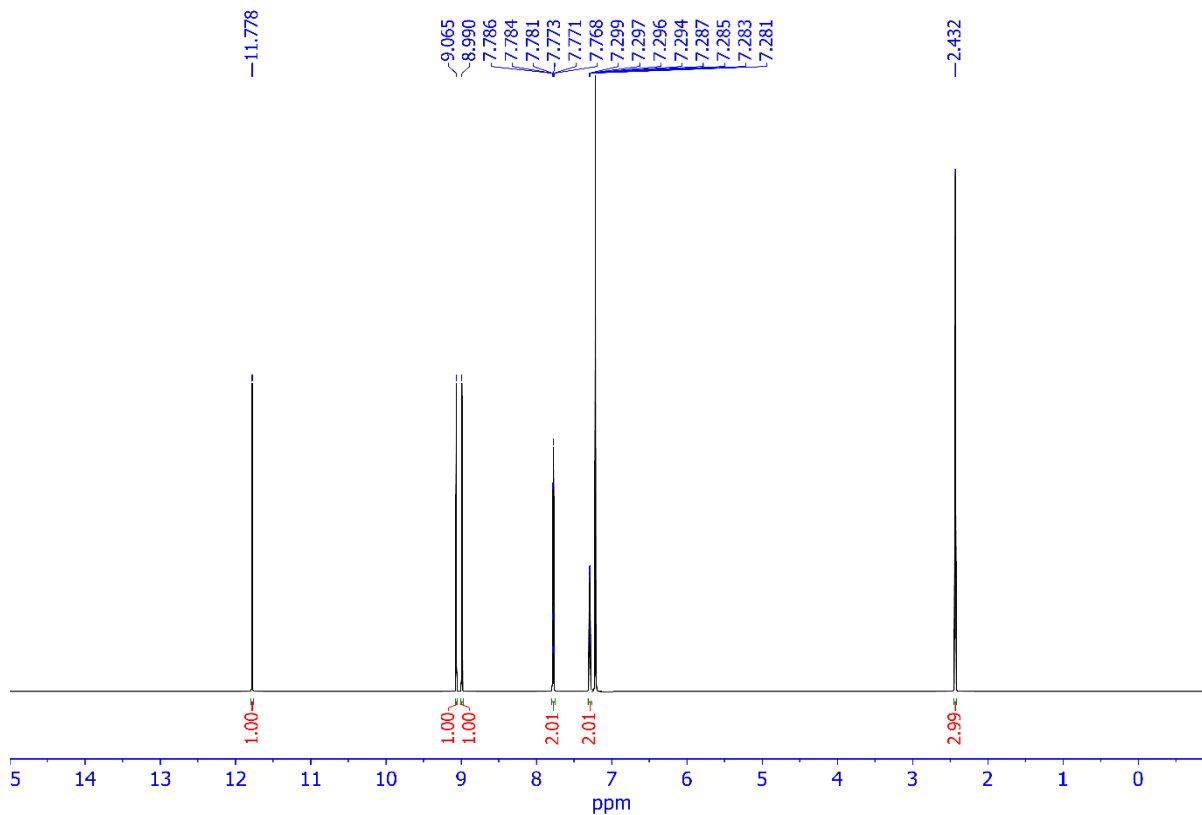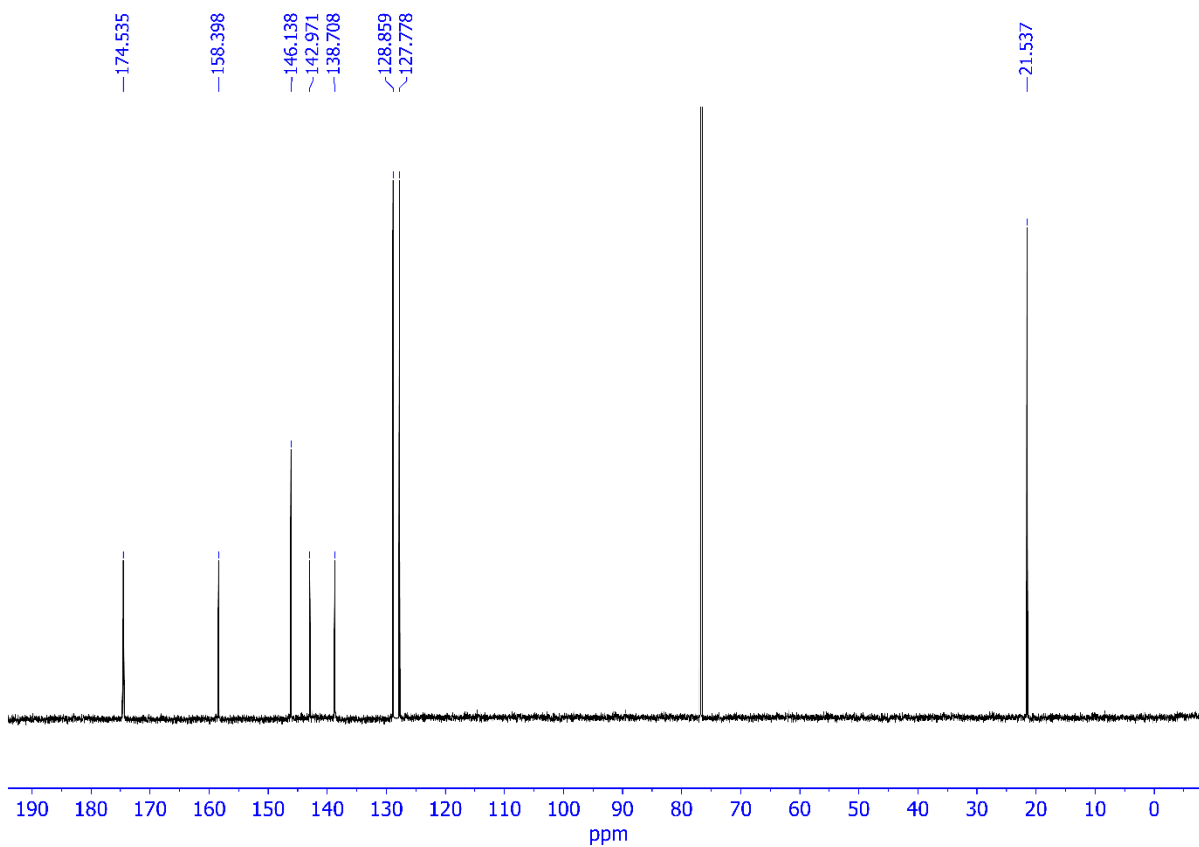

5b\_200506135522 #416 RT: 4.82 AV: 1 NL: 1.34E5  
T: ITMS + c ESI Full ms [50.00-2000.00]

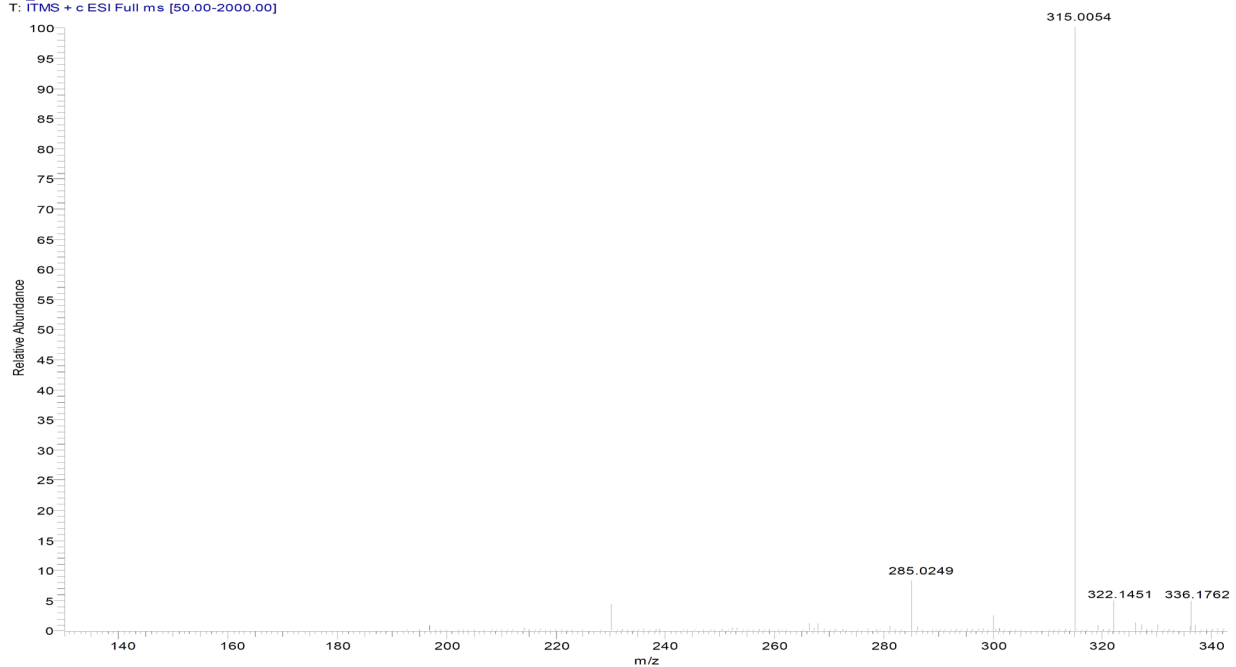

*1-(5-Methyl-1,3,4-thiadiazole-2-yl)-3-(4-tolylsulfonyl)thiourea (6b)*

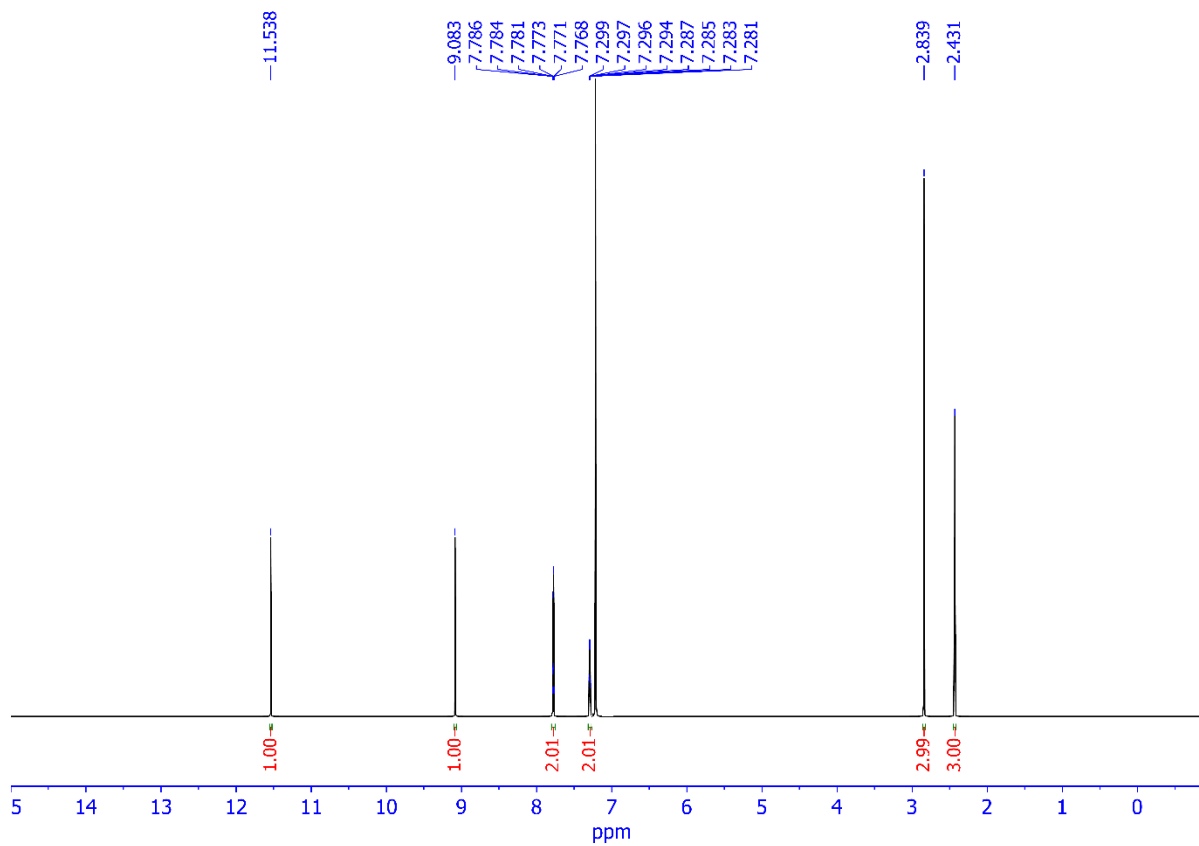

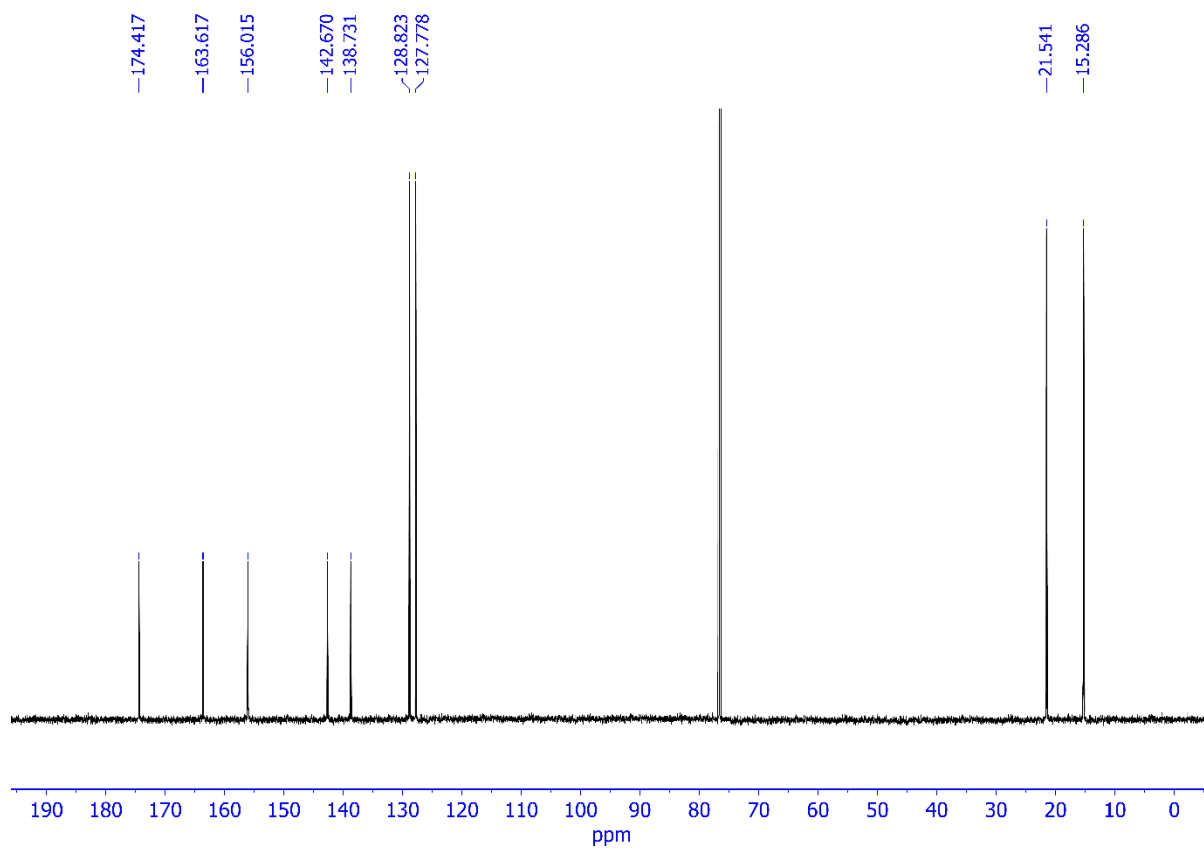

\_200506135521 #416 RT: 4.82 AV: 1 NL: 1.34E5 T:  
ITMS + c ESI Full ms [50.00-2000.00]

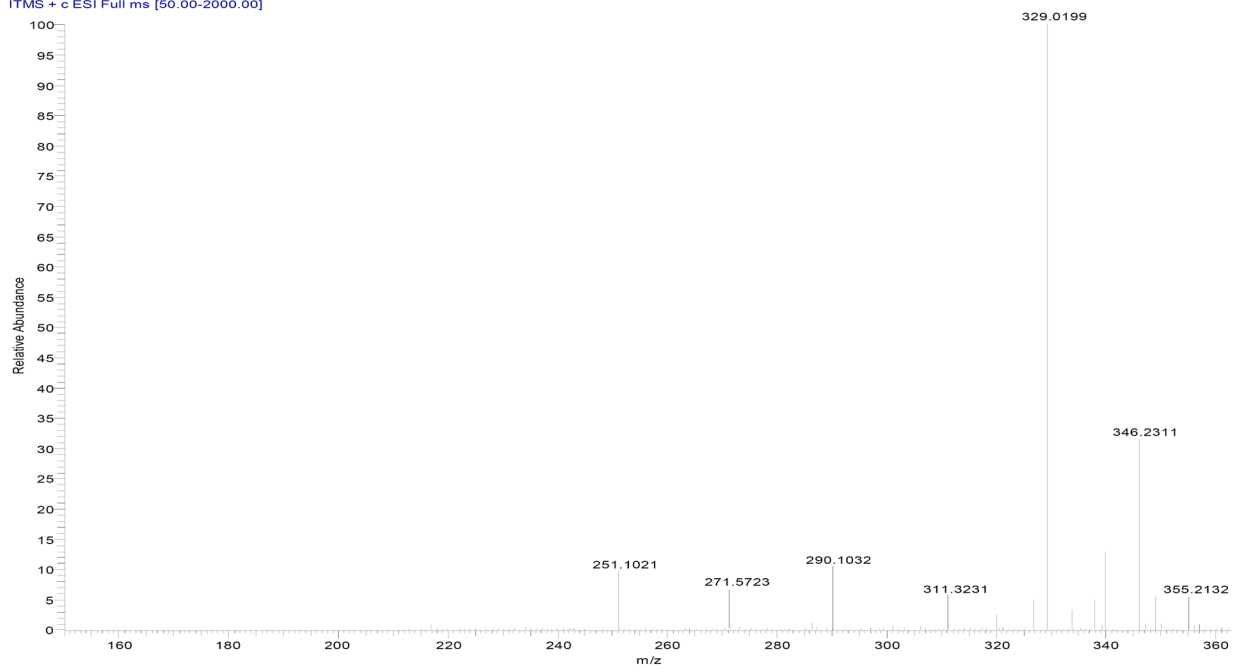

1-(5-Ethyl-1,3,4-thiadiazole-2-yl)-3-(4-tolylsulfonyl)thiourea (6c)

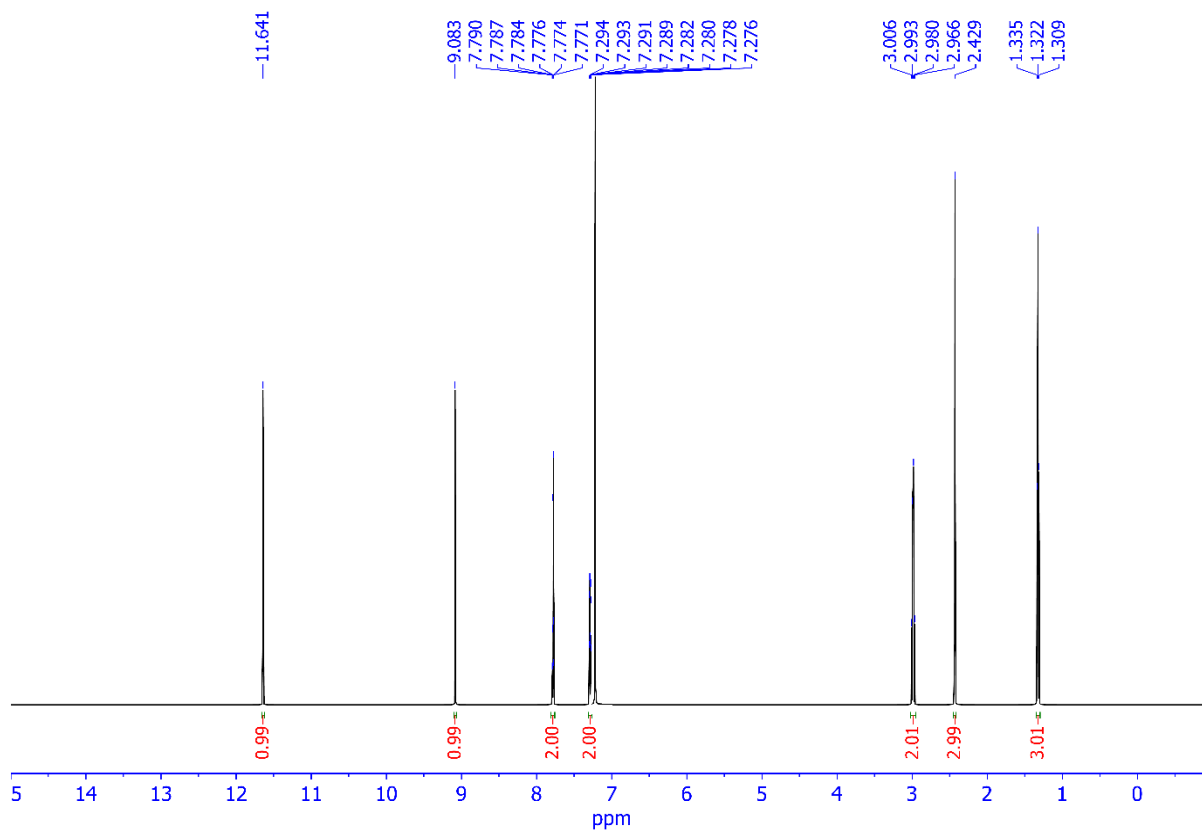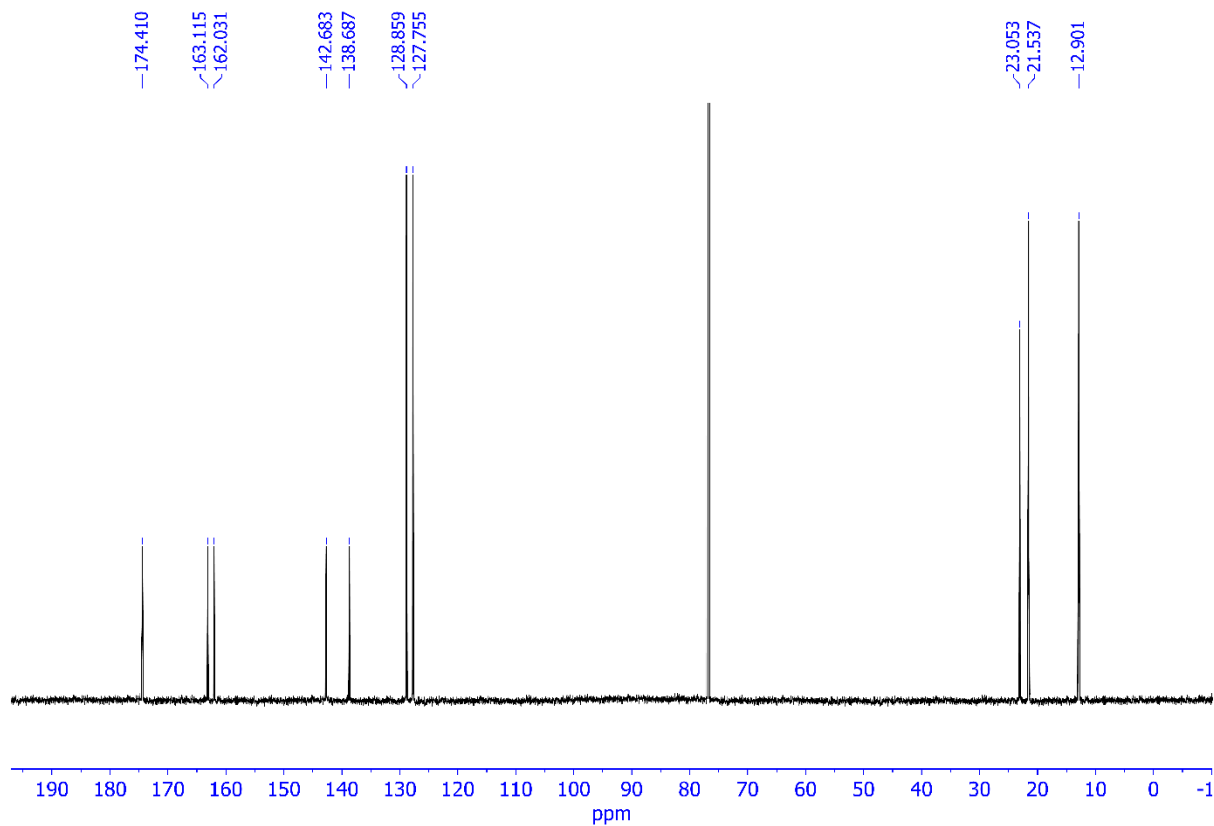

6D\_200506135522 #127 RT: 1.27 AV: 1 NL: 1.73E5  
T: ITMS + c ESI Full ms [50.00-2000.00]

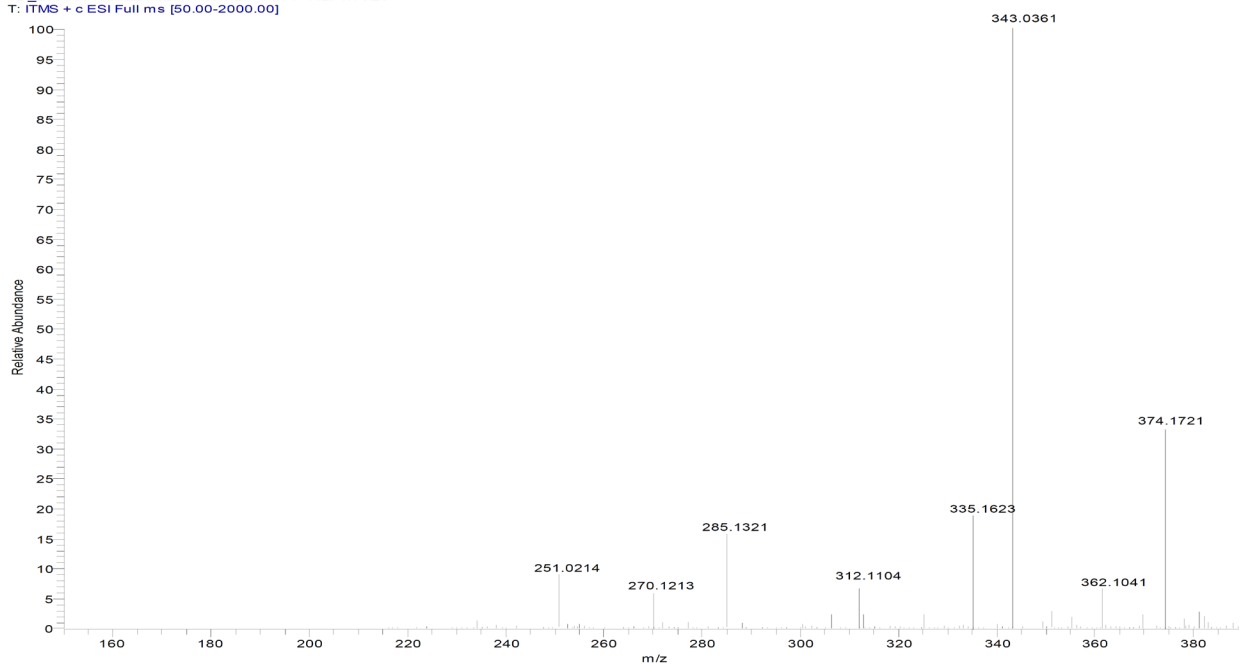

*1-(5-Propyl-1,3,4-thiadiazole-2-yl)-3-(4-tolylsulfonyl)thiourea (6d)*

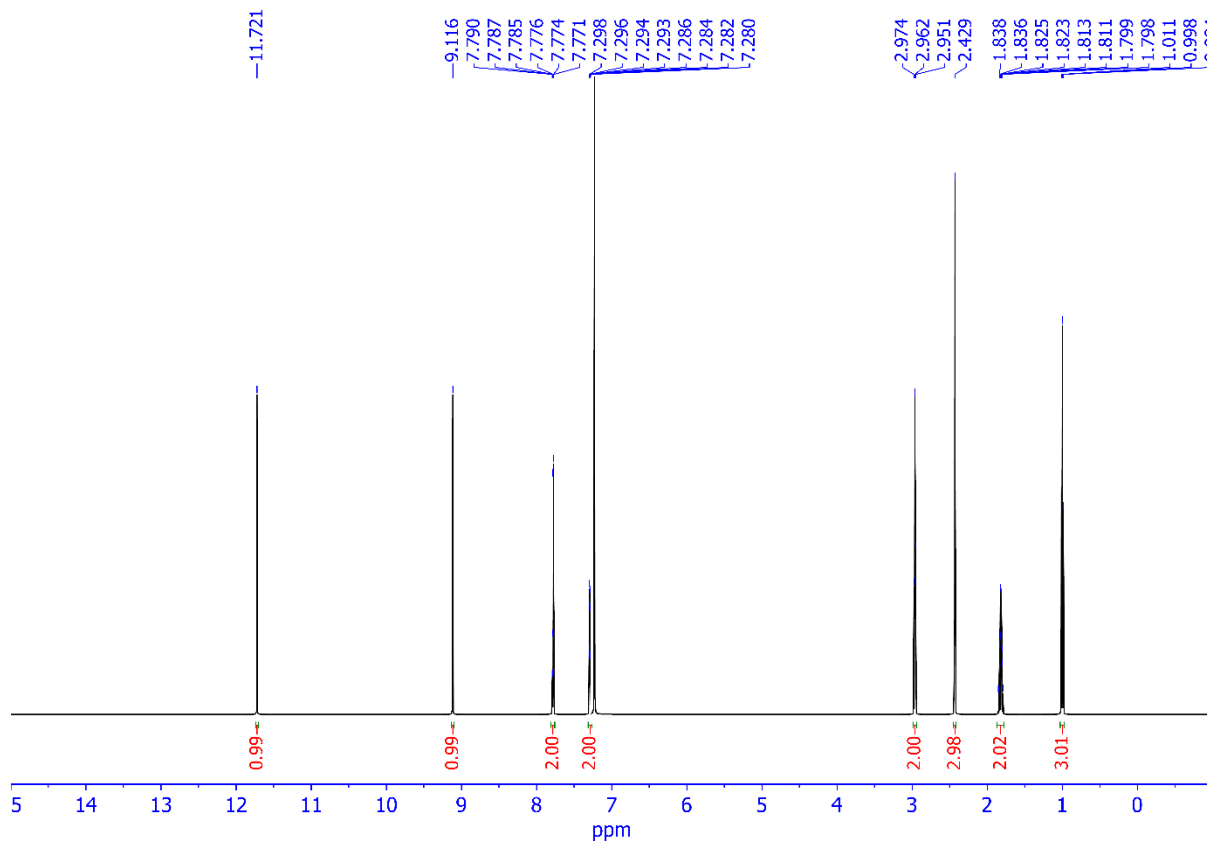

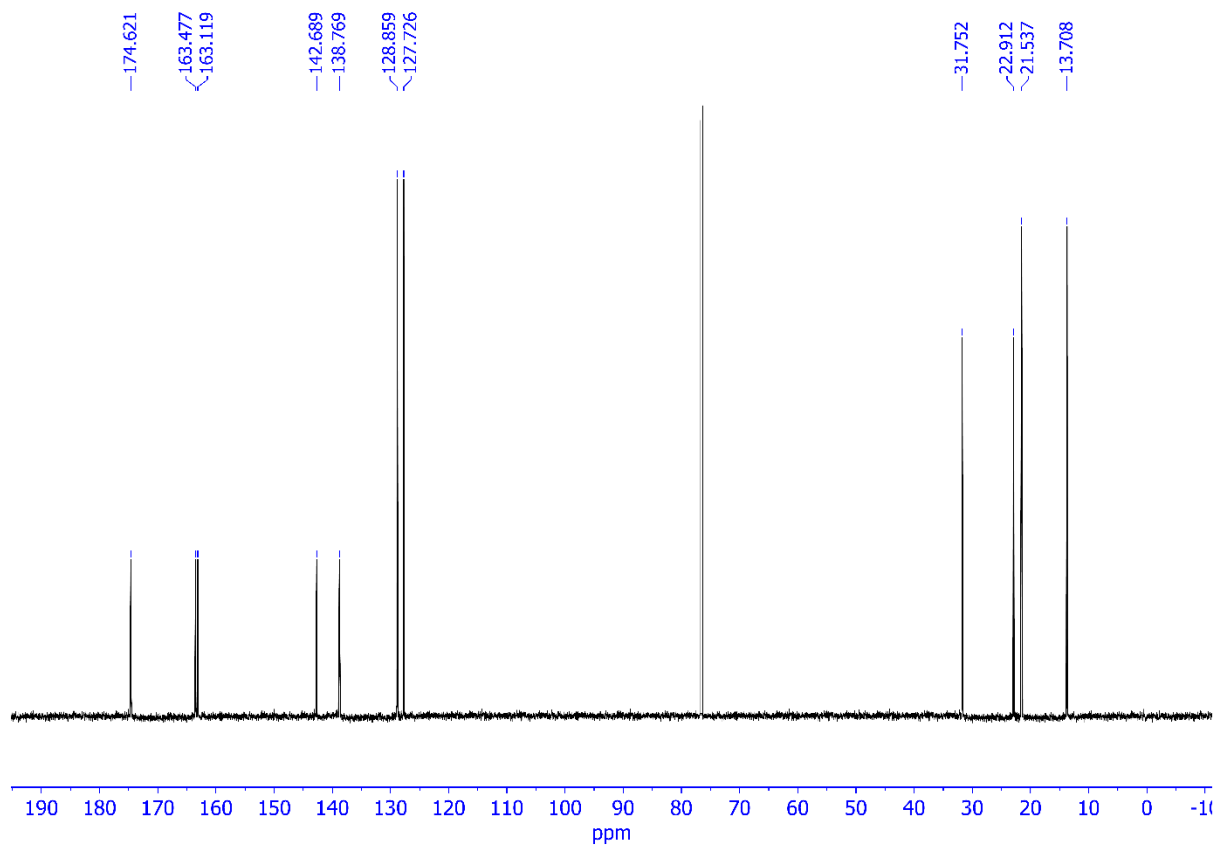

6D\_200506135522 #127 RT: 1.27 AV: 1 NL: 1.73E5  
 T: ITMS + c ESI Full ms [50.00-2000.00]

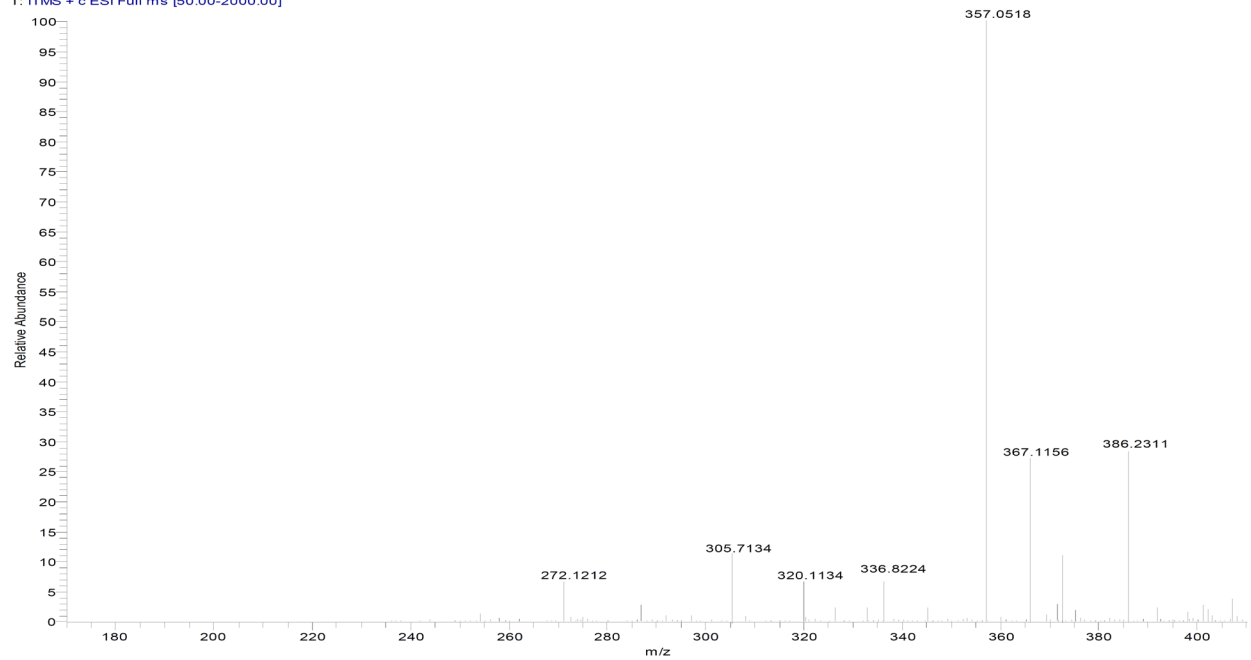

1-(5-Isopropyl-1,3,4-thiadiazole-2-yl)-3-(4-tolylsulfonyl)thiourea (**6e**)

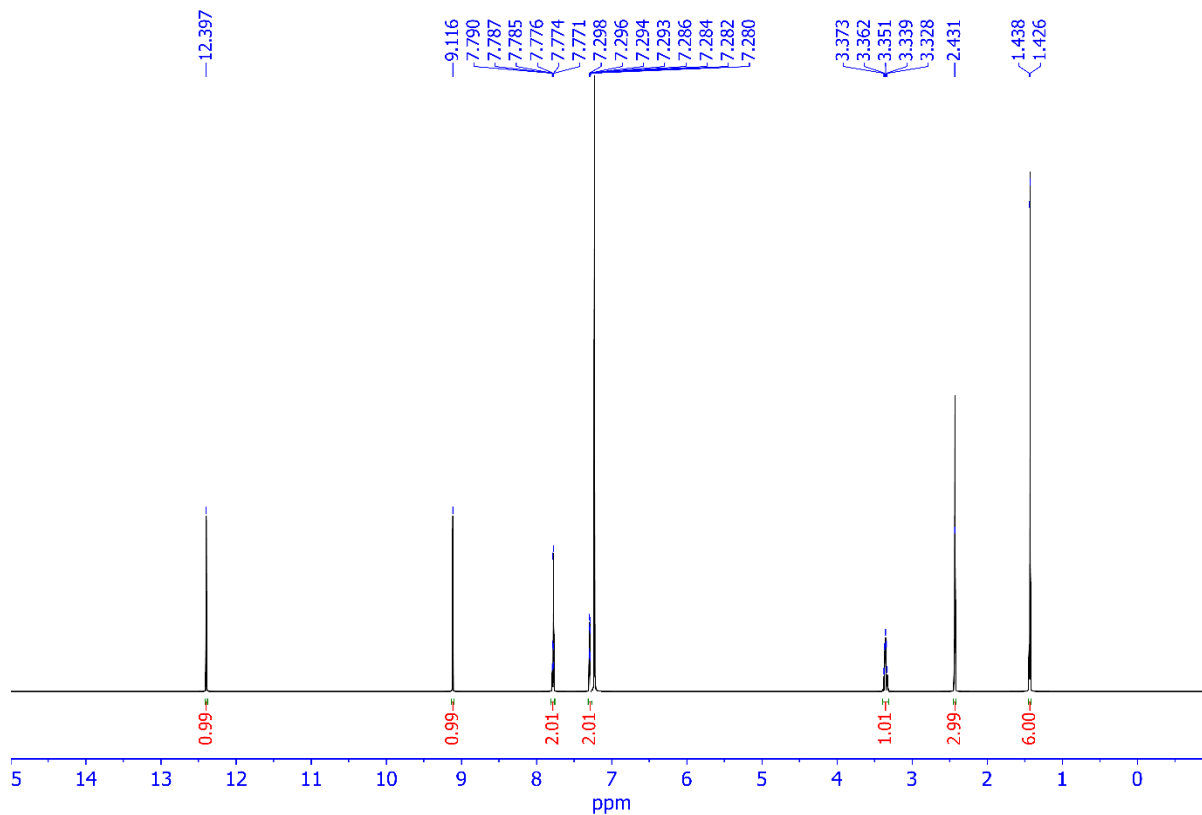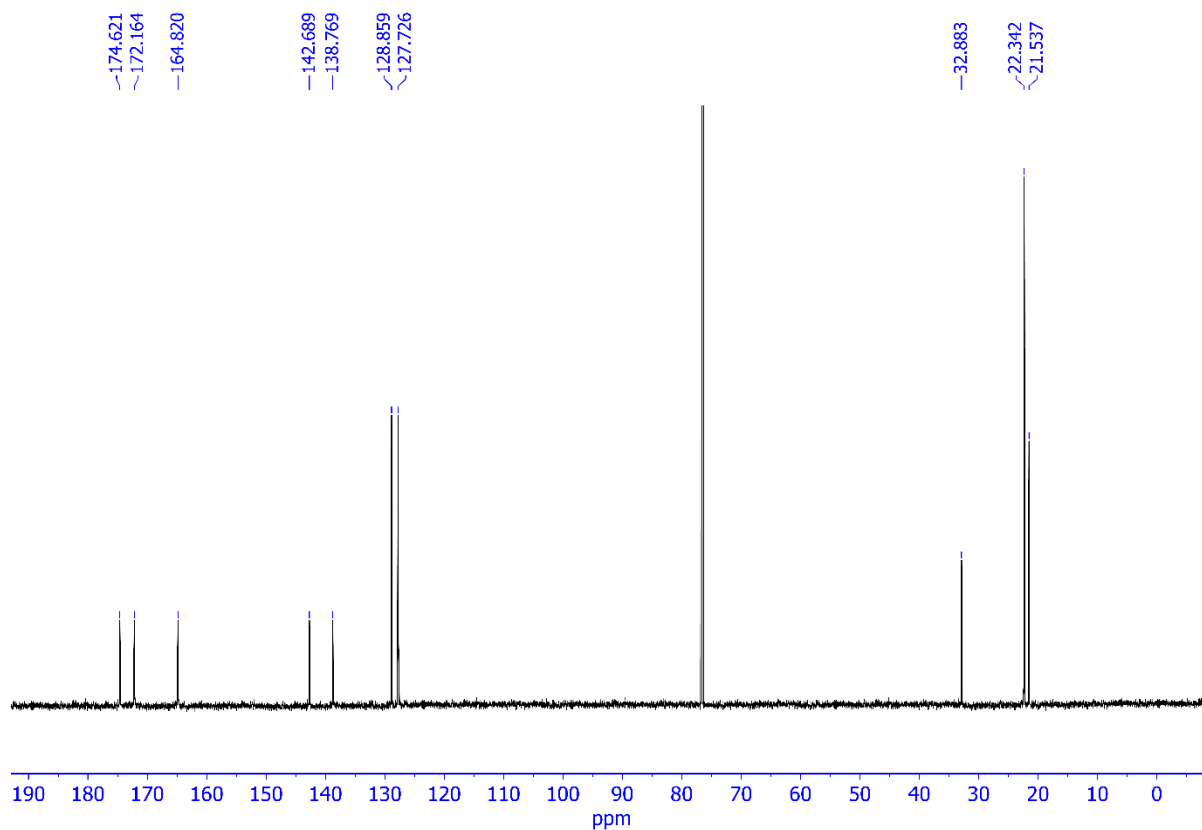



\_200506135522 #416 RT: 4.82 AV: 1 NL: 1.34E5 T:  
ITMS + c ESI Full ms [50.00-2000.00]

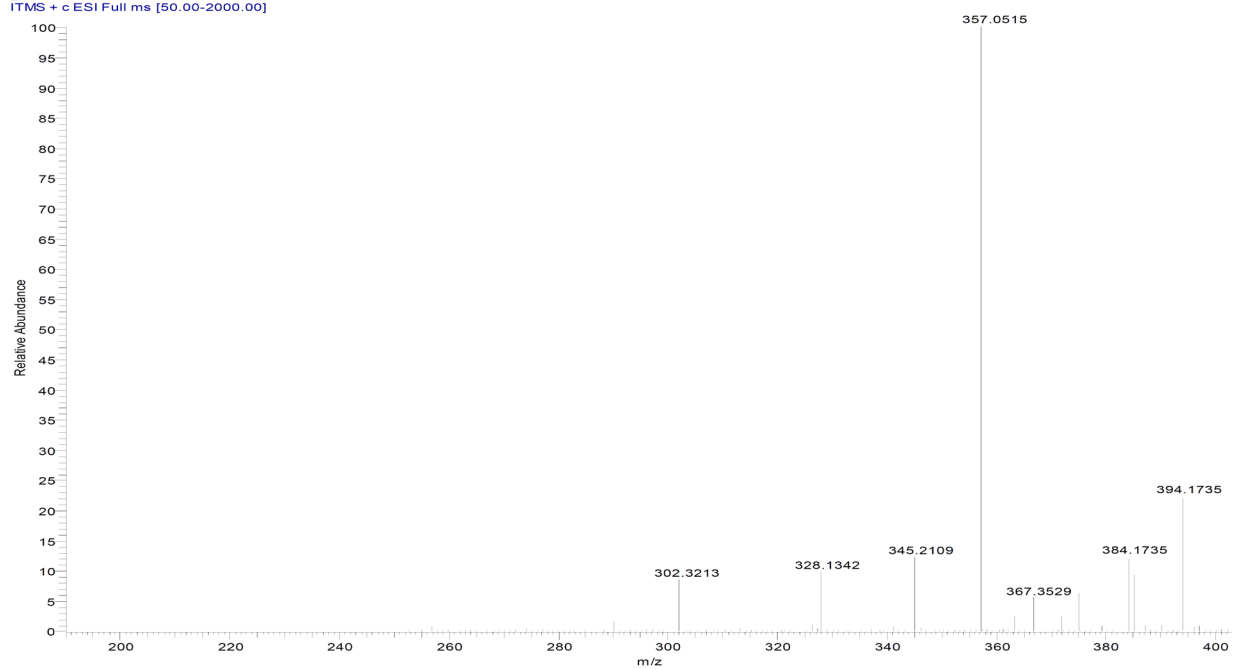

*1-(5-Butyl-1,3,4-thiadiazole-2-yl)-3-(4-tolylsulfonyl)thiourea (6f)*

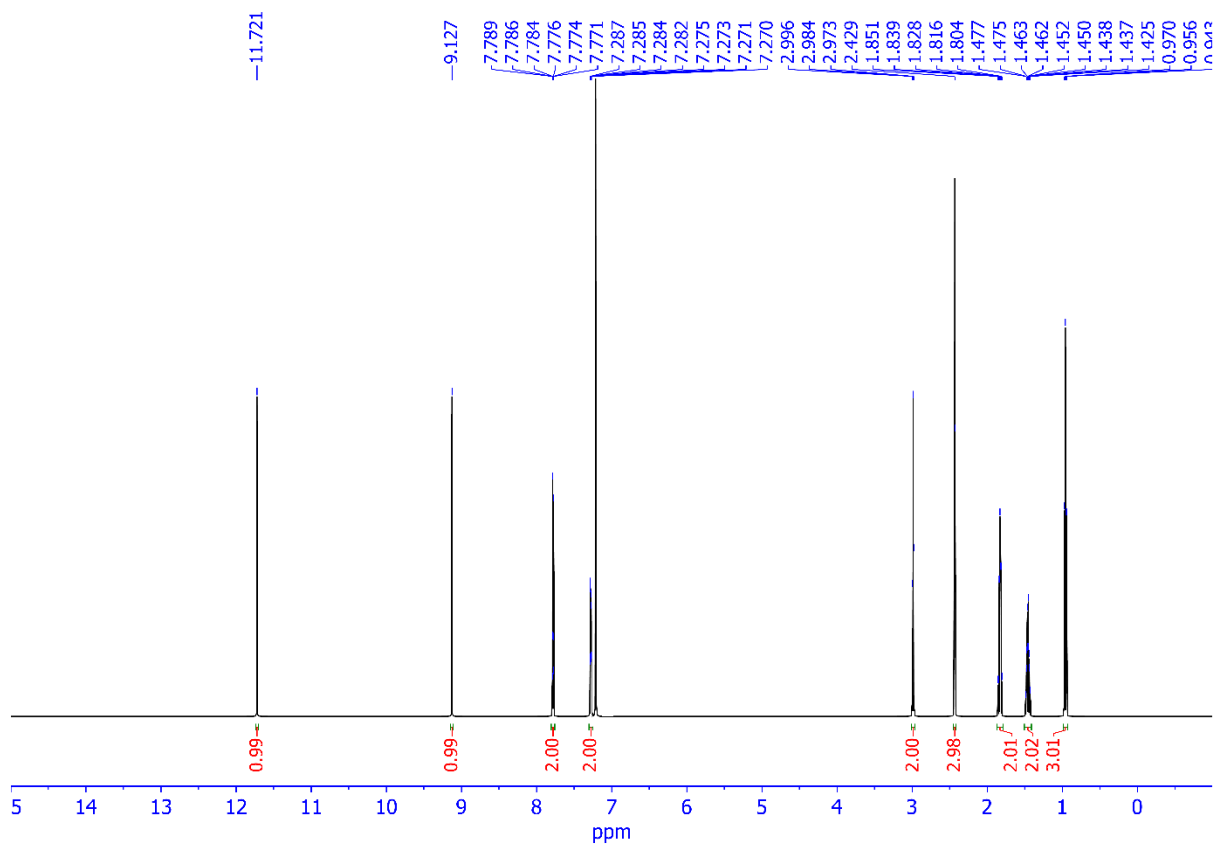

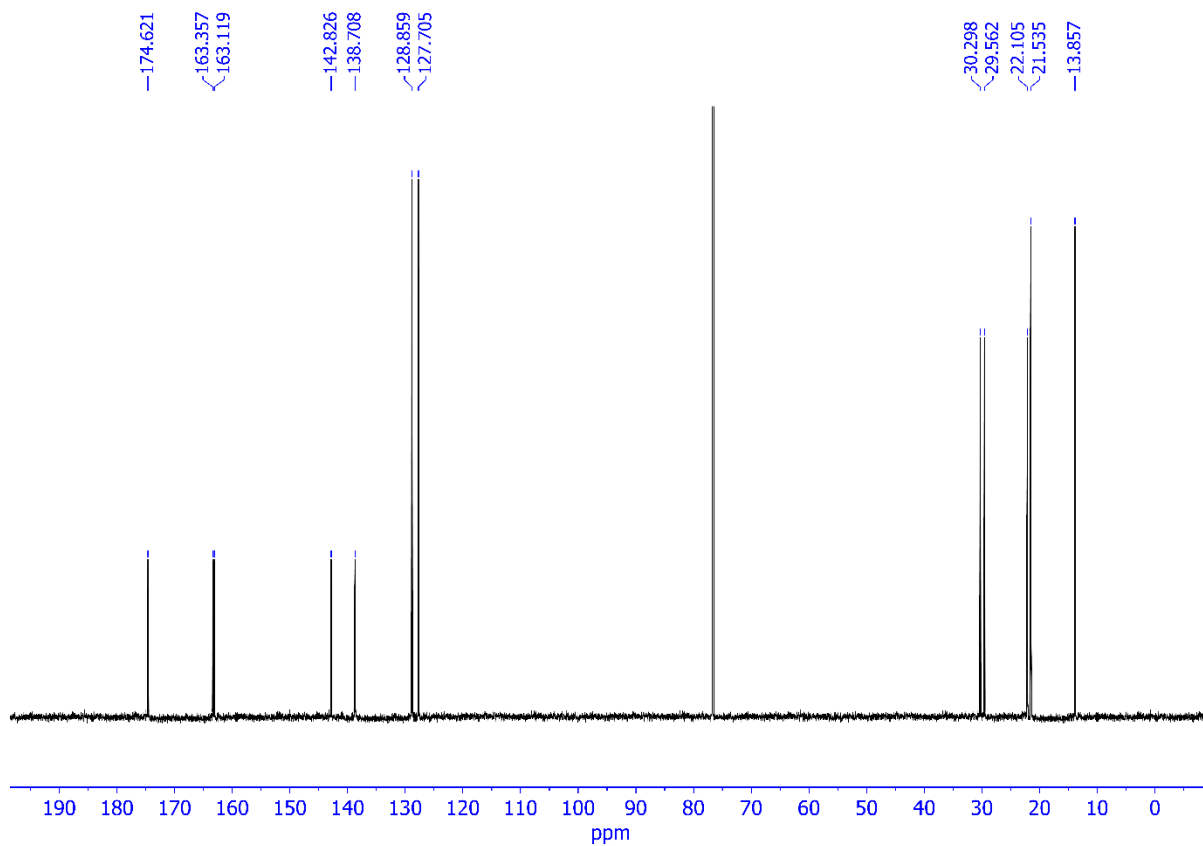

\_200506135521 #416 RT: 4.82 AV: 1 NL: 1.34E5 T:  
ITMS + c ESI Full ms [50.00-2000.00]

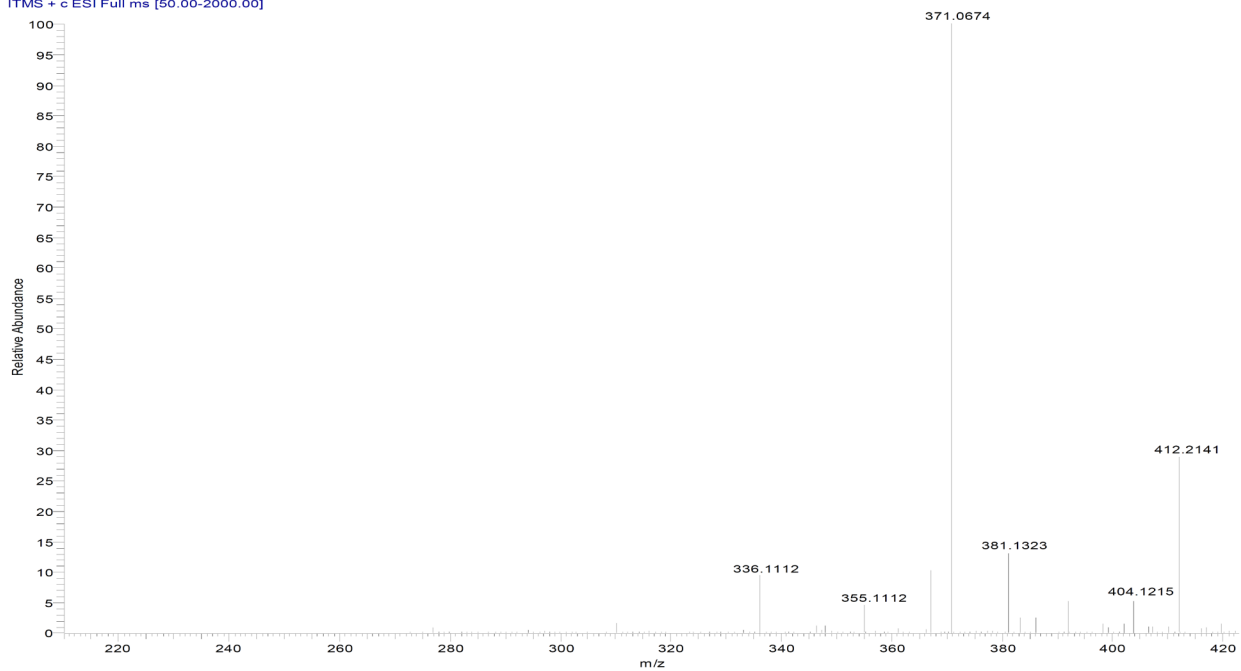

*1-(5-Isobutyl-1,3,4-thiadiazole-2-yl)-3-(4-tolylsulfonyl)thiourea (6g)*

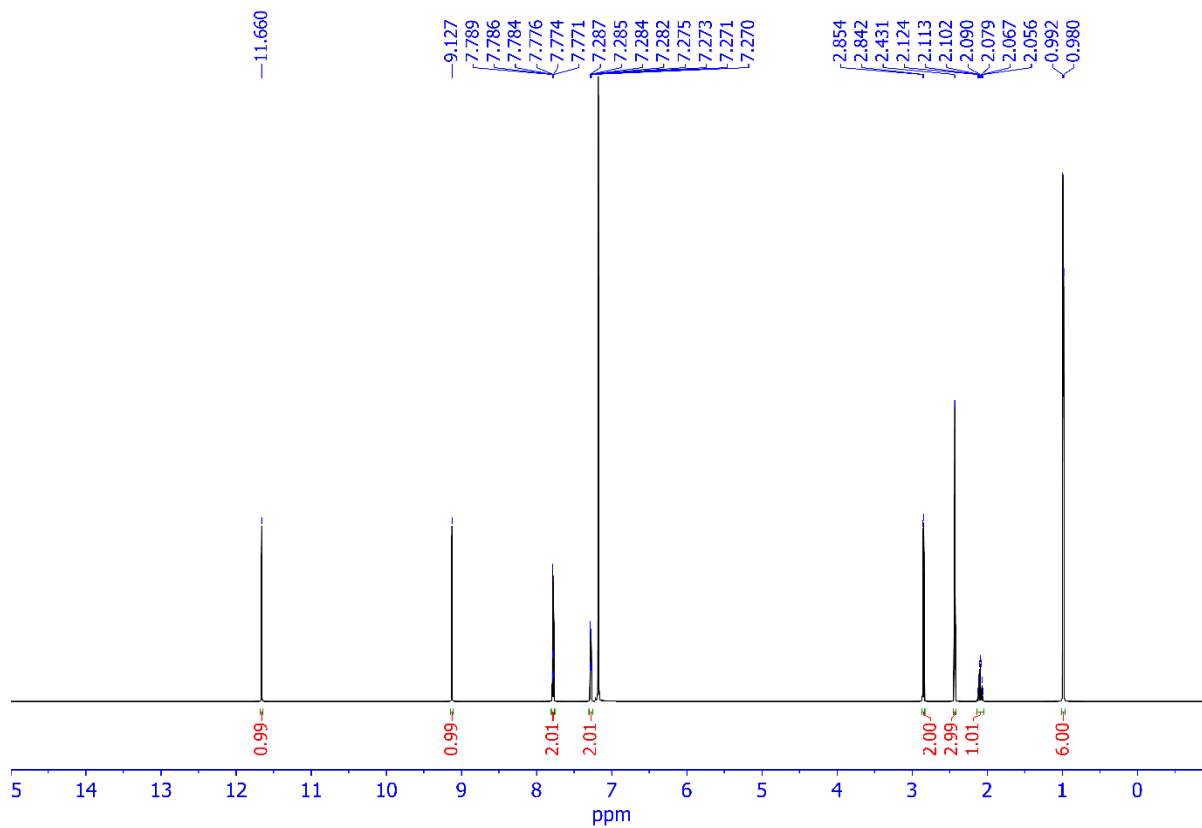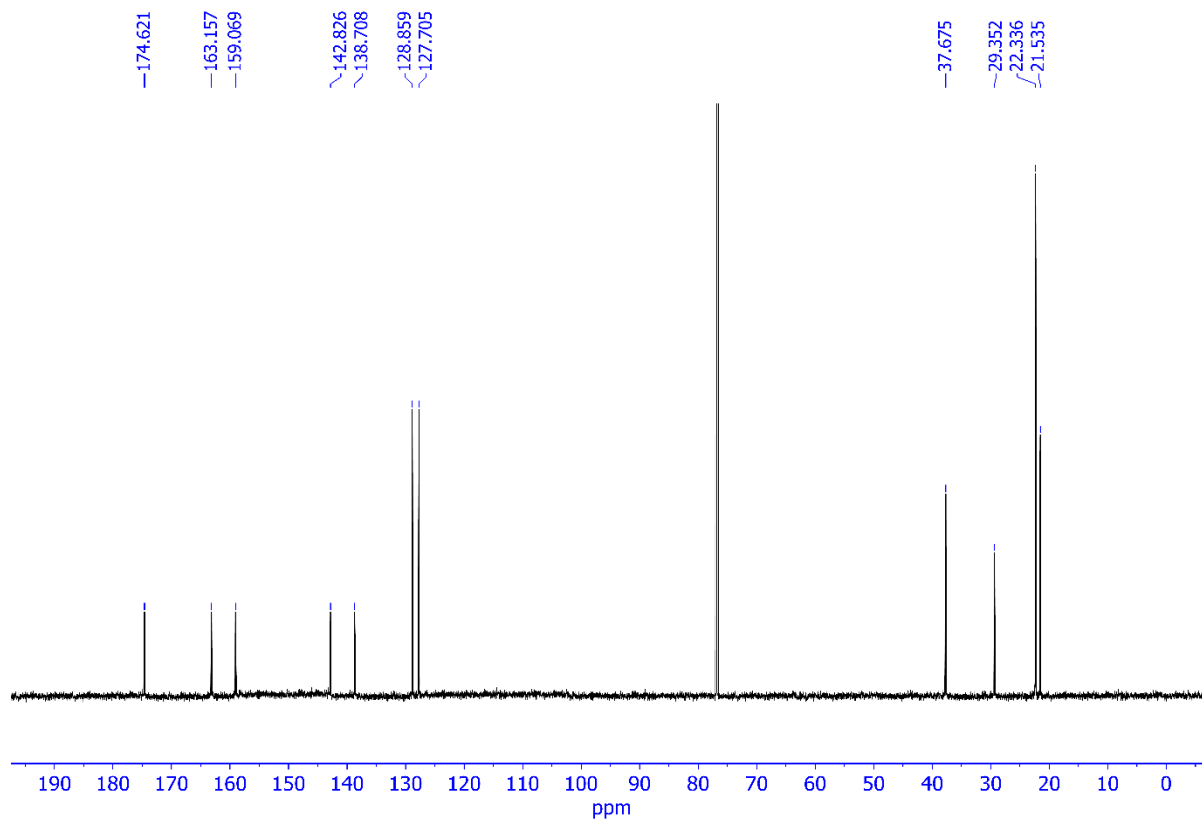

\_200506135521 #416 RT: 4.82 AV: 1 NL: 1.34E5 T:  
ITMS + c ESI Full ms [50.00-2000.00]

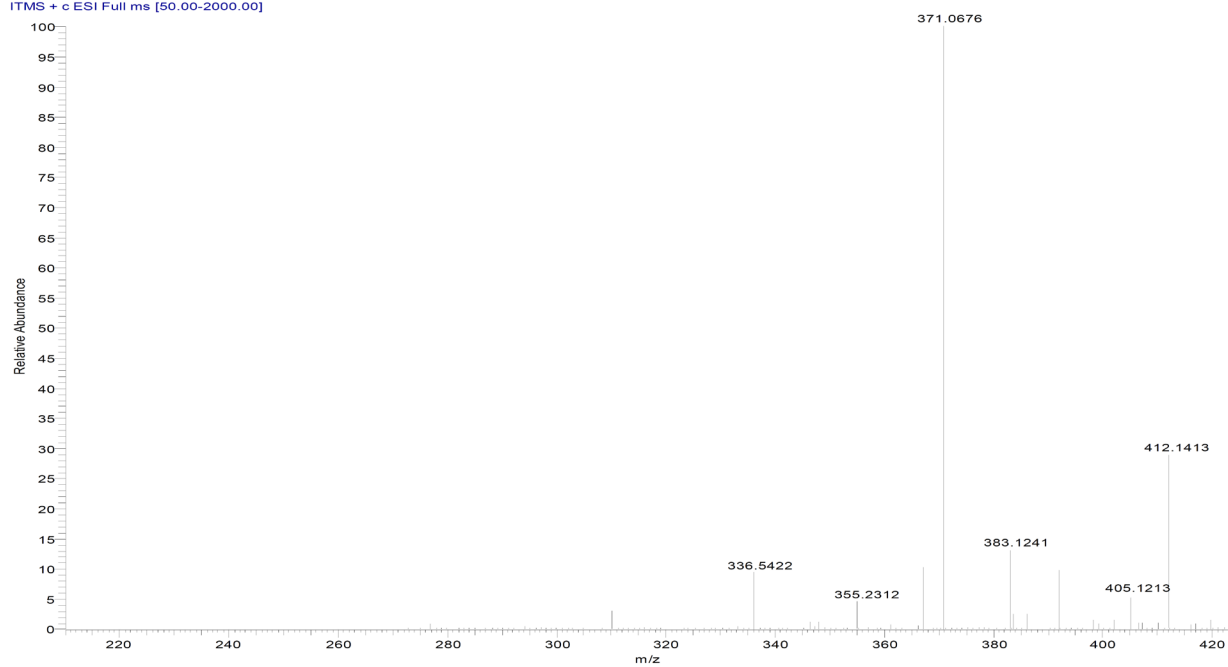

*1-(5-Pentyl-1,3,4-thiadiazole-2-yl)-3-(4-tolylsulfonyl)thiourea (6h)*

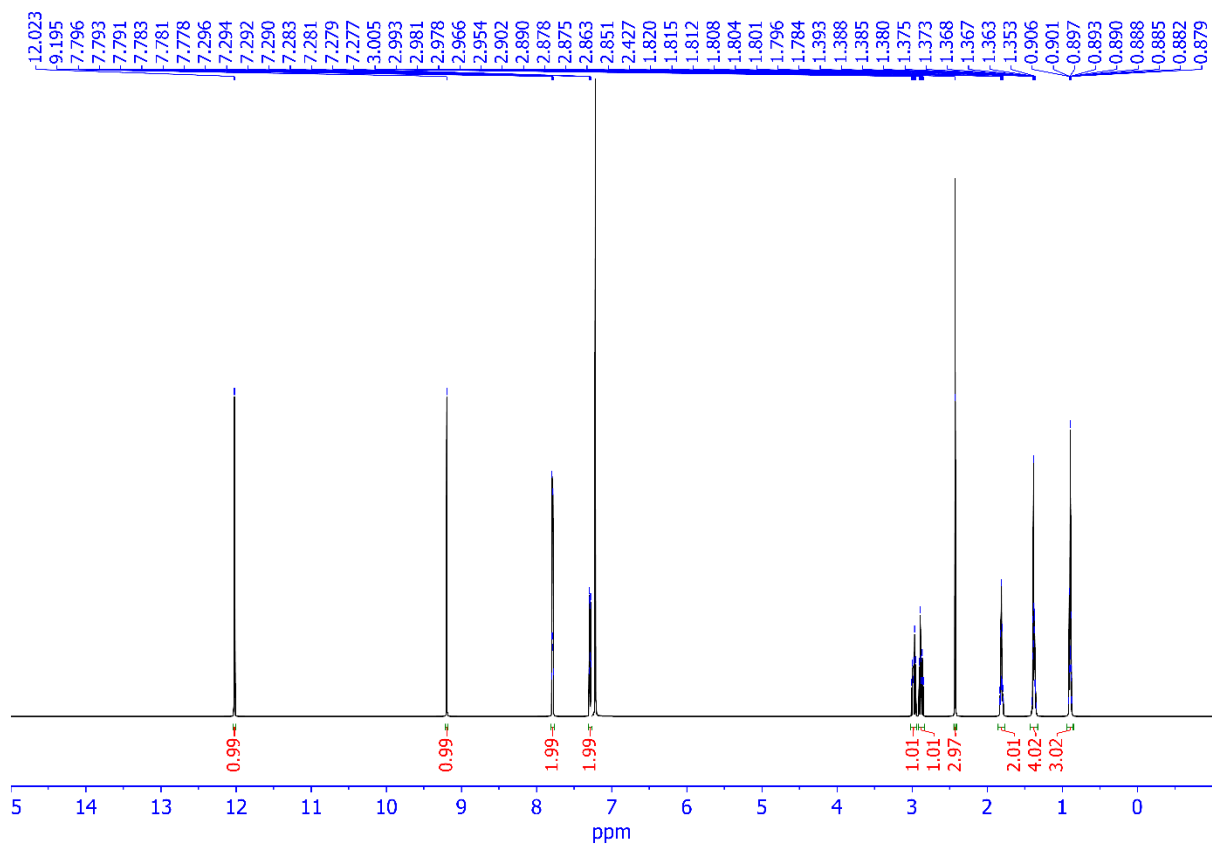

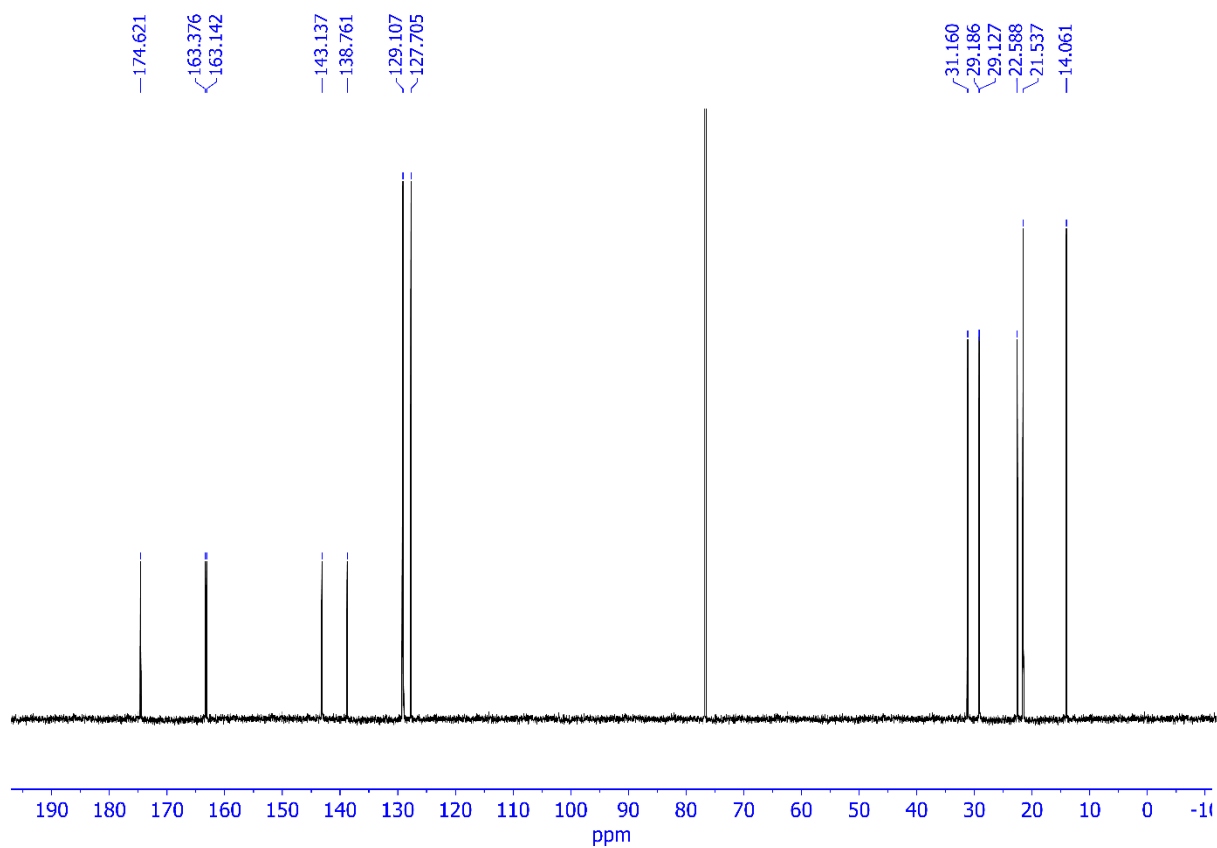

\_200506135521 #416 RT: 4.82 AV: 1 NL: 1.34E5 T:  
ITMS + c ESI Full ms [50.00-2000.00]

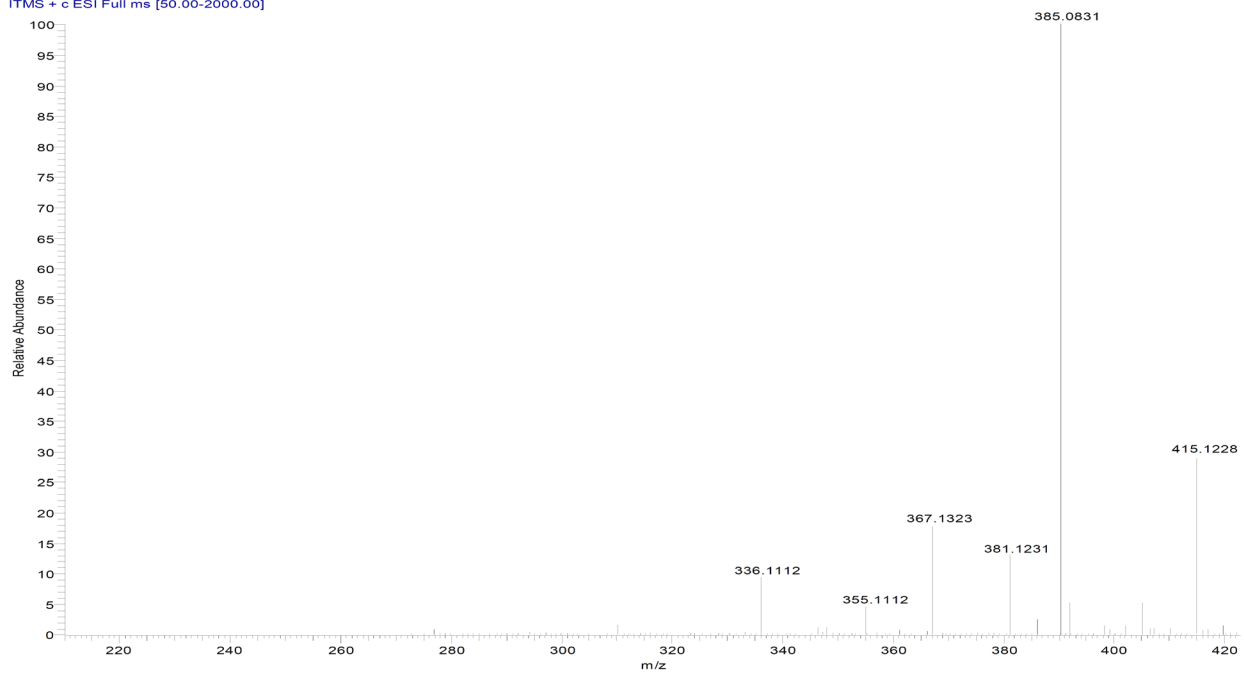

1-(5-Isopentyl-1,3,4-thiadiazole-2-yl)-3-(4-tolylsulfonyl)thiourea (**6i**)

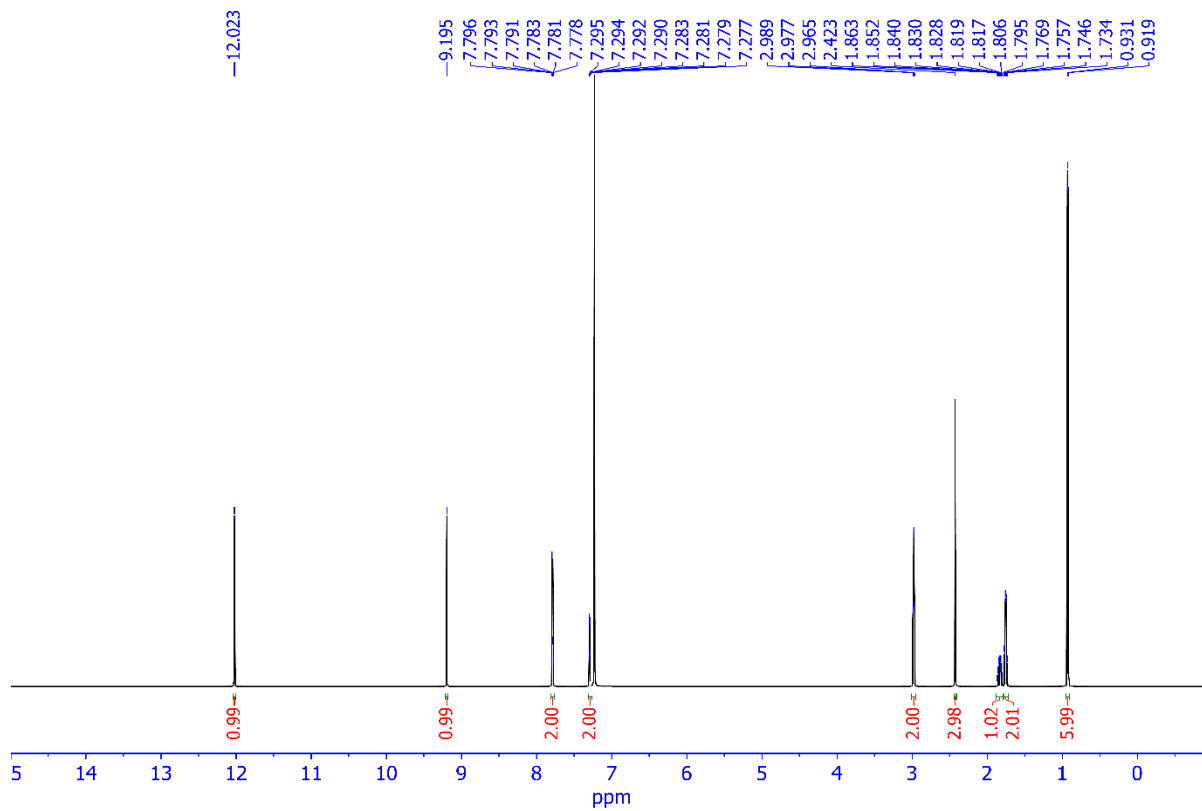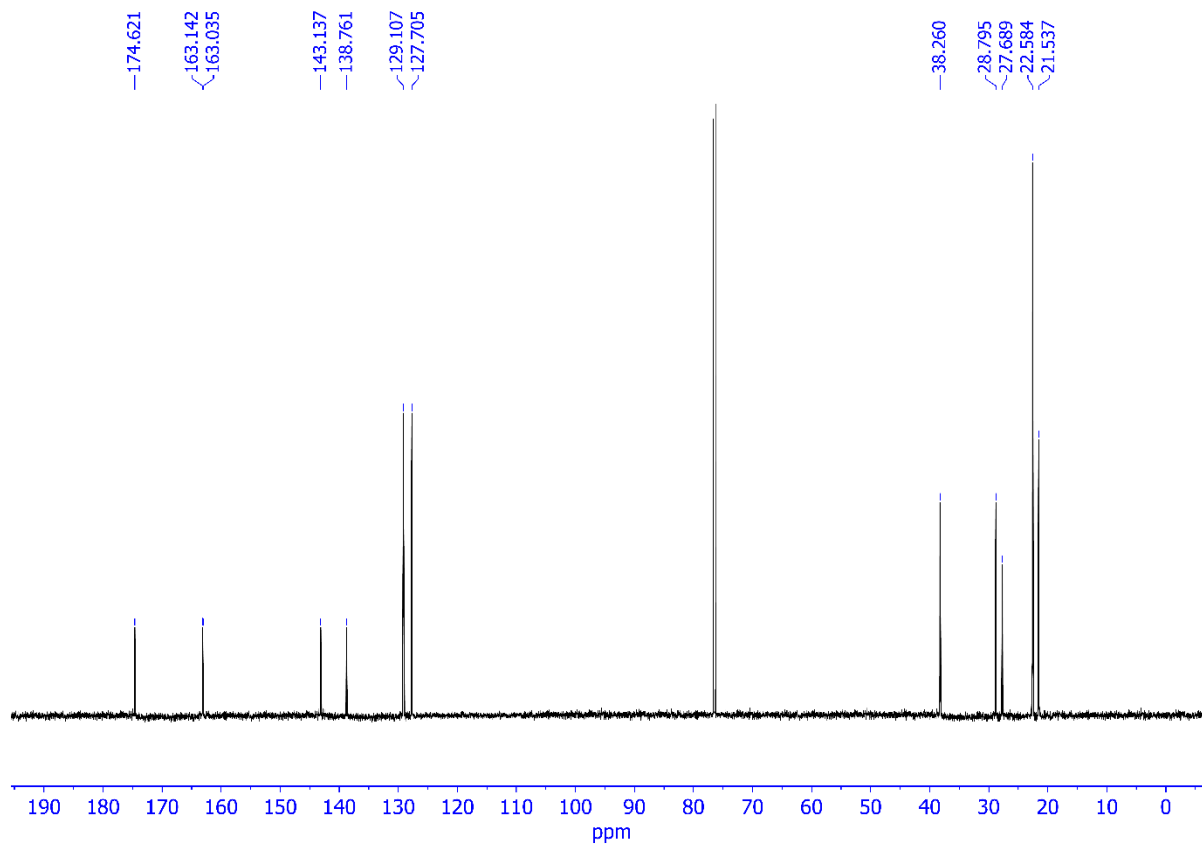

\_200506135521 #416 RT: 4.82 AV: 1 NL: 1.34E5 T:  
ITMS + c ESI Full ms [50.00-2000.00]

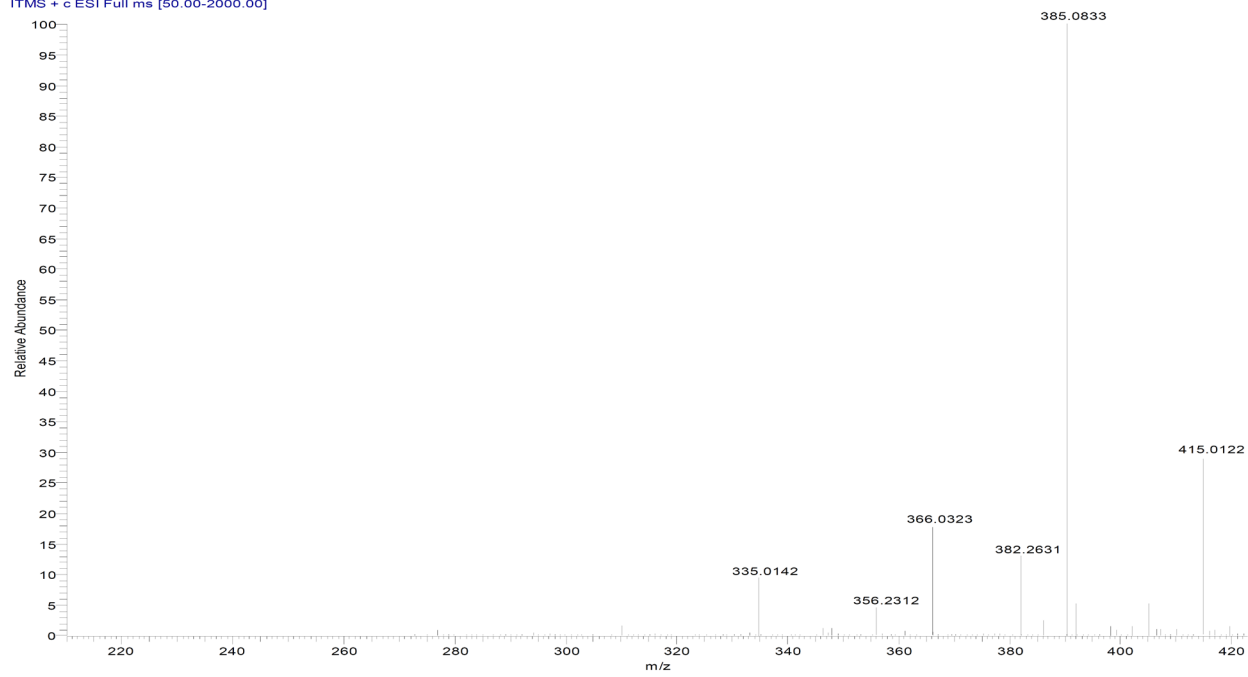

Supplement: d3md00508a1.pdf [file d3md00508a1.pdf]
